# Supplementary material for: Loss of SIRT2 leads to axonal degeneration and locomotor disability associated with redox and energy imbalance
Source: PubMed Central journal article supplement (PMC5676070; doi:10.1111/acel.12682), 2017-10-05

# Circadian Activity

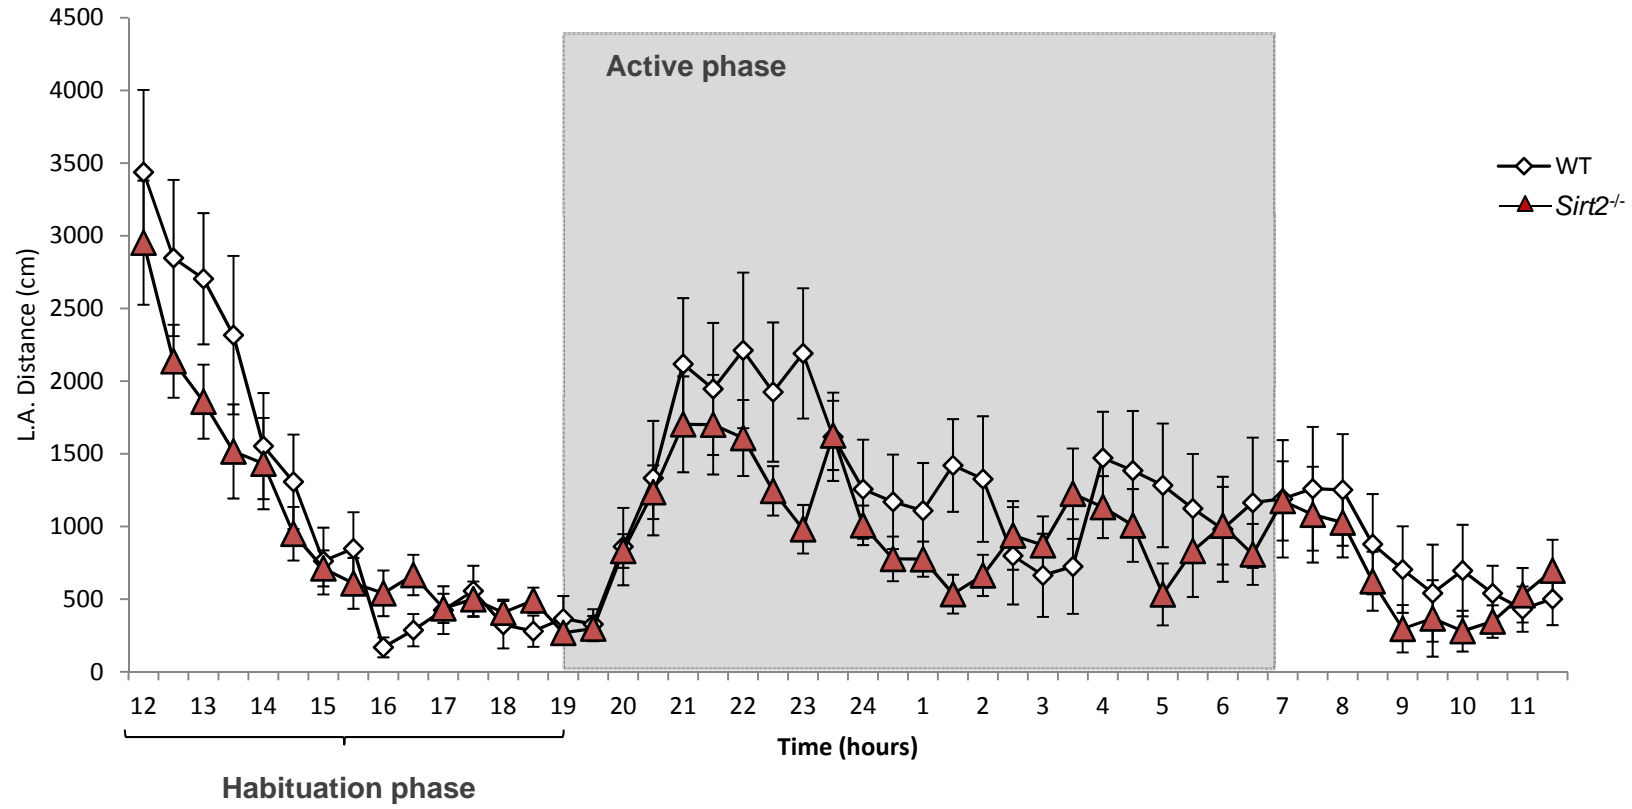

Supplemental figure 1

### A Grip Strength

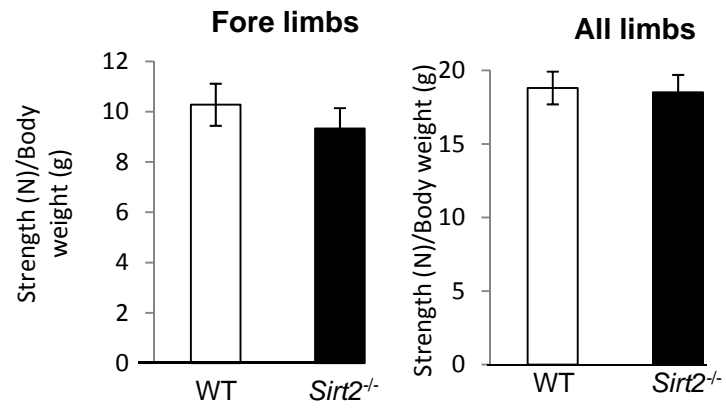

### B Hot plate: nociceptive responses

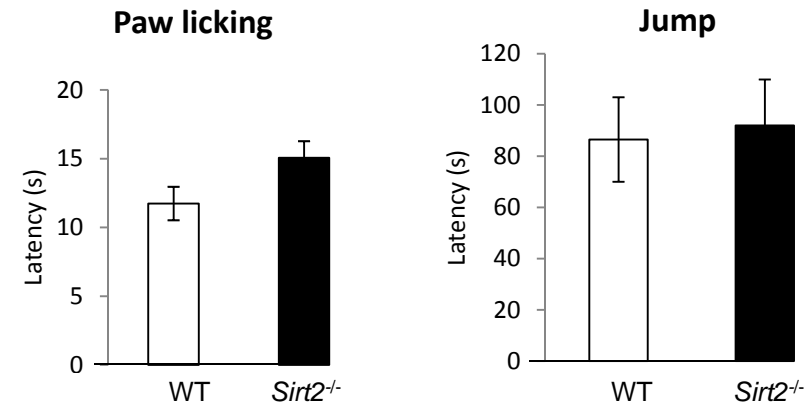

### C Elevated plus maze: anxiety response

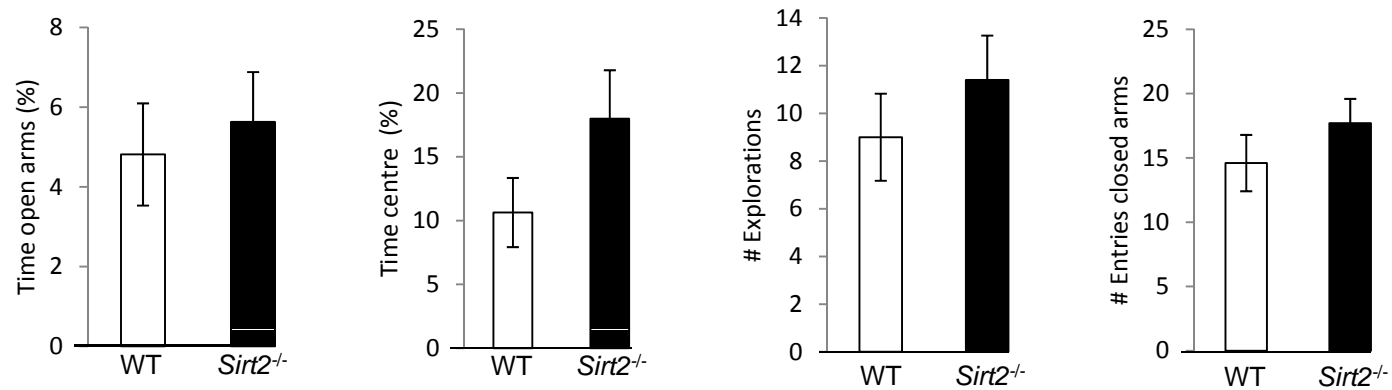

**A** Y maze: spontaneous alternation

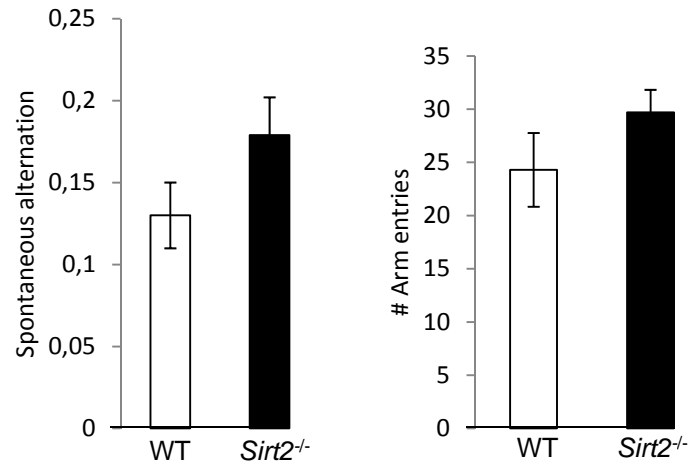

**B** Familiarization phase of the novel object recognition task

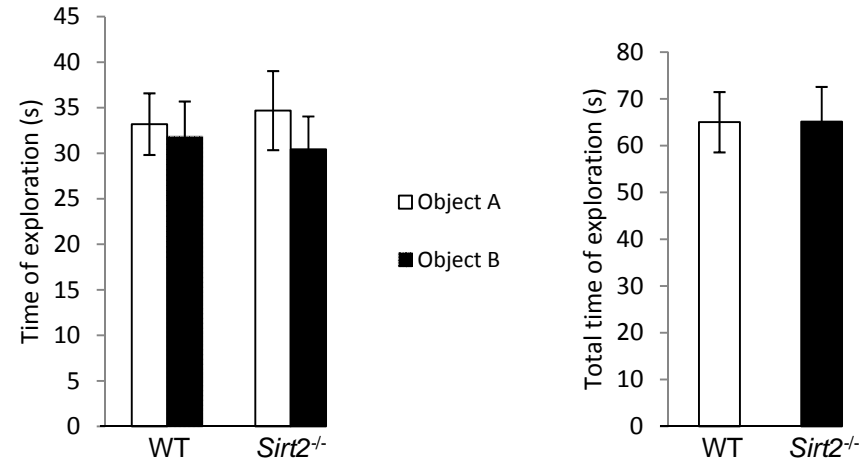

**C** Test phase of the novel object recognition task

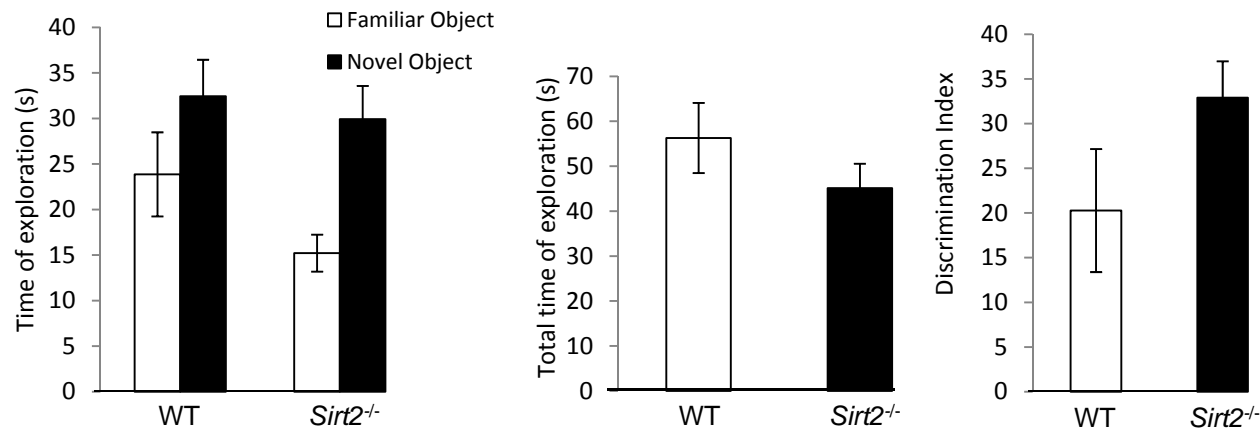

**D** Passive Avoidance

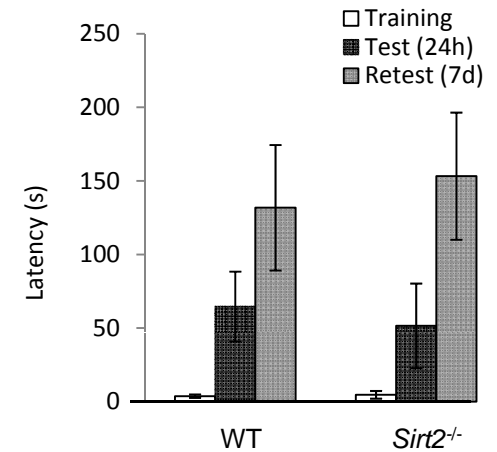

Supplement: ACEL-16-1404-s001.pdf [file ACEL-16-1404-s001.pdf]
